# Supplementary material for: Exploring the Use of Tobacco Waste as a Metal Ion Adsorbent and Substrate for Sulphate-Reducing Bacteria during the Treatment of Acid Mine Drainage
Source: MDPI journal article supplement (doi:10.3390/su142114333), 2022-11-02
Supplement: s1 [file s1]

## Supplementary data:

**Table S1:** Equations used in analyzing adsorption data

| Expression name     | Non-linear version                                           | Constants                | Key attributes                                                                                         | References                     |
|---------------------|--------------------------------------------------------------|--------------------------|--------------------------------------------------------------------------------------------------------|--------------------------------|
| Langmuir isotherm   | $q_e = \frac{q_m K_L C_e}{1 + K_L C_e}$                      | $K_L, q_m$               | Normally describes mono layer adsorption for dilute systems. Most suited isotherm for desulfurisation. | (Muzic et al., 2010)           |
| Freundlich isotherm | $q_e = K_F C_e^{1/n}$                                        | $K_F, n$                 | Non ideal irreversible and multilayer adsorption concepts.                                             | (Proctor & Toro-Vazquez, 1996) |
| Sips isotherm       | $q_e = \frac{K_s C_e^{\beta_s}}{1 + \alpha_s C_e^{\beta_s}}$ | $K_s, \beta_s, \alpha_s$ | Combines Freundlich and Langmuir behaviour to describe heterogeneous systems                           | (Sips, 1948)                   |
| PFO kinetics        | $q_t = q_e (1 - e^{-k_1 t})$                                 | $k_1$                    | Based on pseudo first order reaction equations.                                                        | (Azizian, 2004)                |
| PSO kinetics        | $q_t = \frac{q_e^2 k_2 t}{1 + k_2 q_e t}$                    | $k_2$                    | Successfully modelled metal removals from wastewater in previous studies                               | (Ho, 2014)                     |
| Exponential decay   | $A = A_0 e^{-kt}$                                            | $k$                      | Models decreasing order values with time                                                               | (Westrich & Berner, 1984)      |

|                            |                                                                                |
|----------------------------|--------------------------------------------------------------------------------|
| $q_e$ :                    | solid phase equilibrium concentration of adsorbate on adsorbent (mg/g)         |
| $q_m$ :                    | maximum adsorption capacity of the adsorbent (mg/g)                            |
| $q_t$ :                    | adsorbate concentration on adsorbent after duration t during adsorption (mg/g) |
| $C_e$ :                    | equilibrium concentration of adsorbate in the solvent/liquid phase (mg/L)      |
| $K_L$ :                    | Langmuir constant                                                              |
| $R_L$ :                    | separation factor                                                              |
| $K_F$ :                    | Freundlich constant                                                            |
| $n$ :                      | Freundlich heterogeneity parameter to be determined                            |
| $K_s, \beta_s, \alpha_s$ : | Sips constants                                                                 |
| $k_1, k_2$ and $k_3$ :     | rate constants                                                                 |
| $A, A_0$ :                 | Any variable                                                                   |
| $k$ :                      | exponential decay constant                                                     |

**Table S2:** Exponential decay parameters for modelling metal ion concentration during bioremediation

| Exponential Model            | Metal/<br>Variable | Fe(5) | Fe(4) | Ni    | Cu    | Zn    |
|------------------------------|--------------------|-------|-------|-------|-------|-------|
| Decay constants              | C                  | 21.5  | 9.0   | 0.5   | 9.8   | 0     |
|                              | $k_1$              | 0.100 | 0.096 | 0.104 | 0.113 | 0.063 |
| Coefficient of determination | $R^2$              | 0.97  | 0.99  | 0.99  | 0.97  | 0.95  |

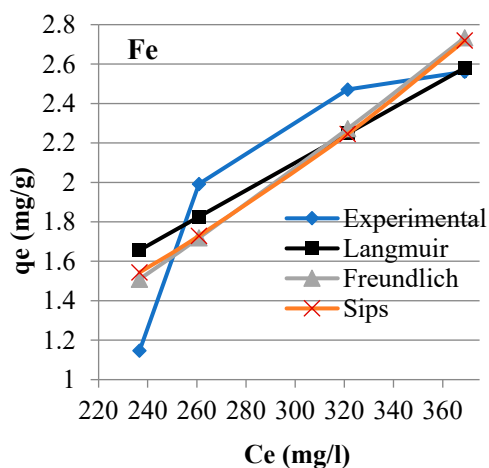

(a)

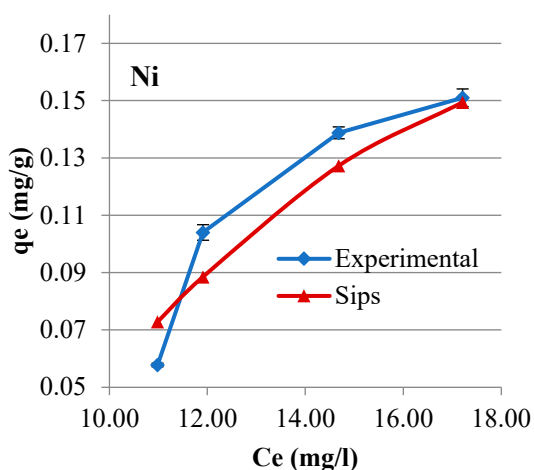

(b)

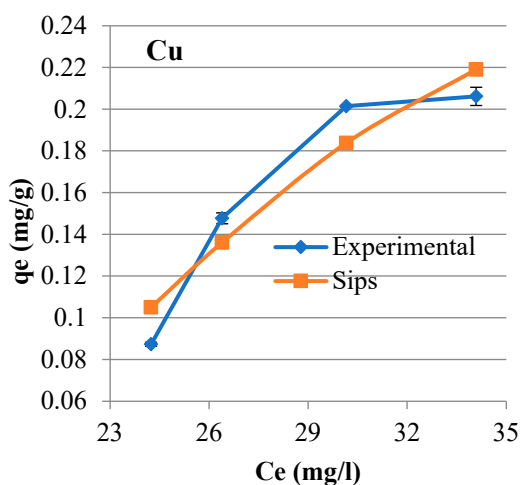

(c)

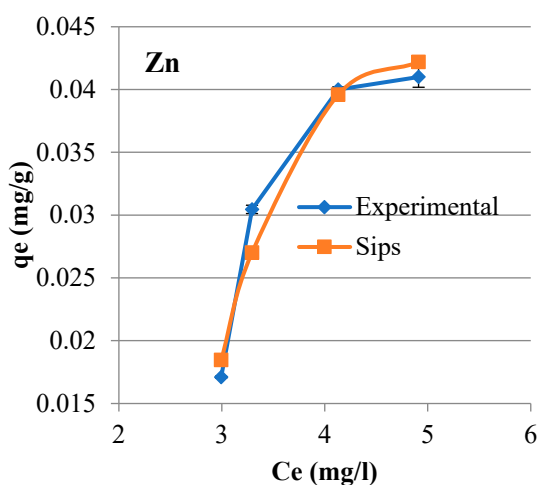

(d)

**Figure S1:** Adsorption isotherms for (a) Fe (b) Ni (c) Cu and (d) Zn on 80 g/L tobacco waste

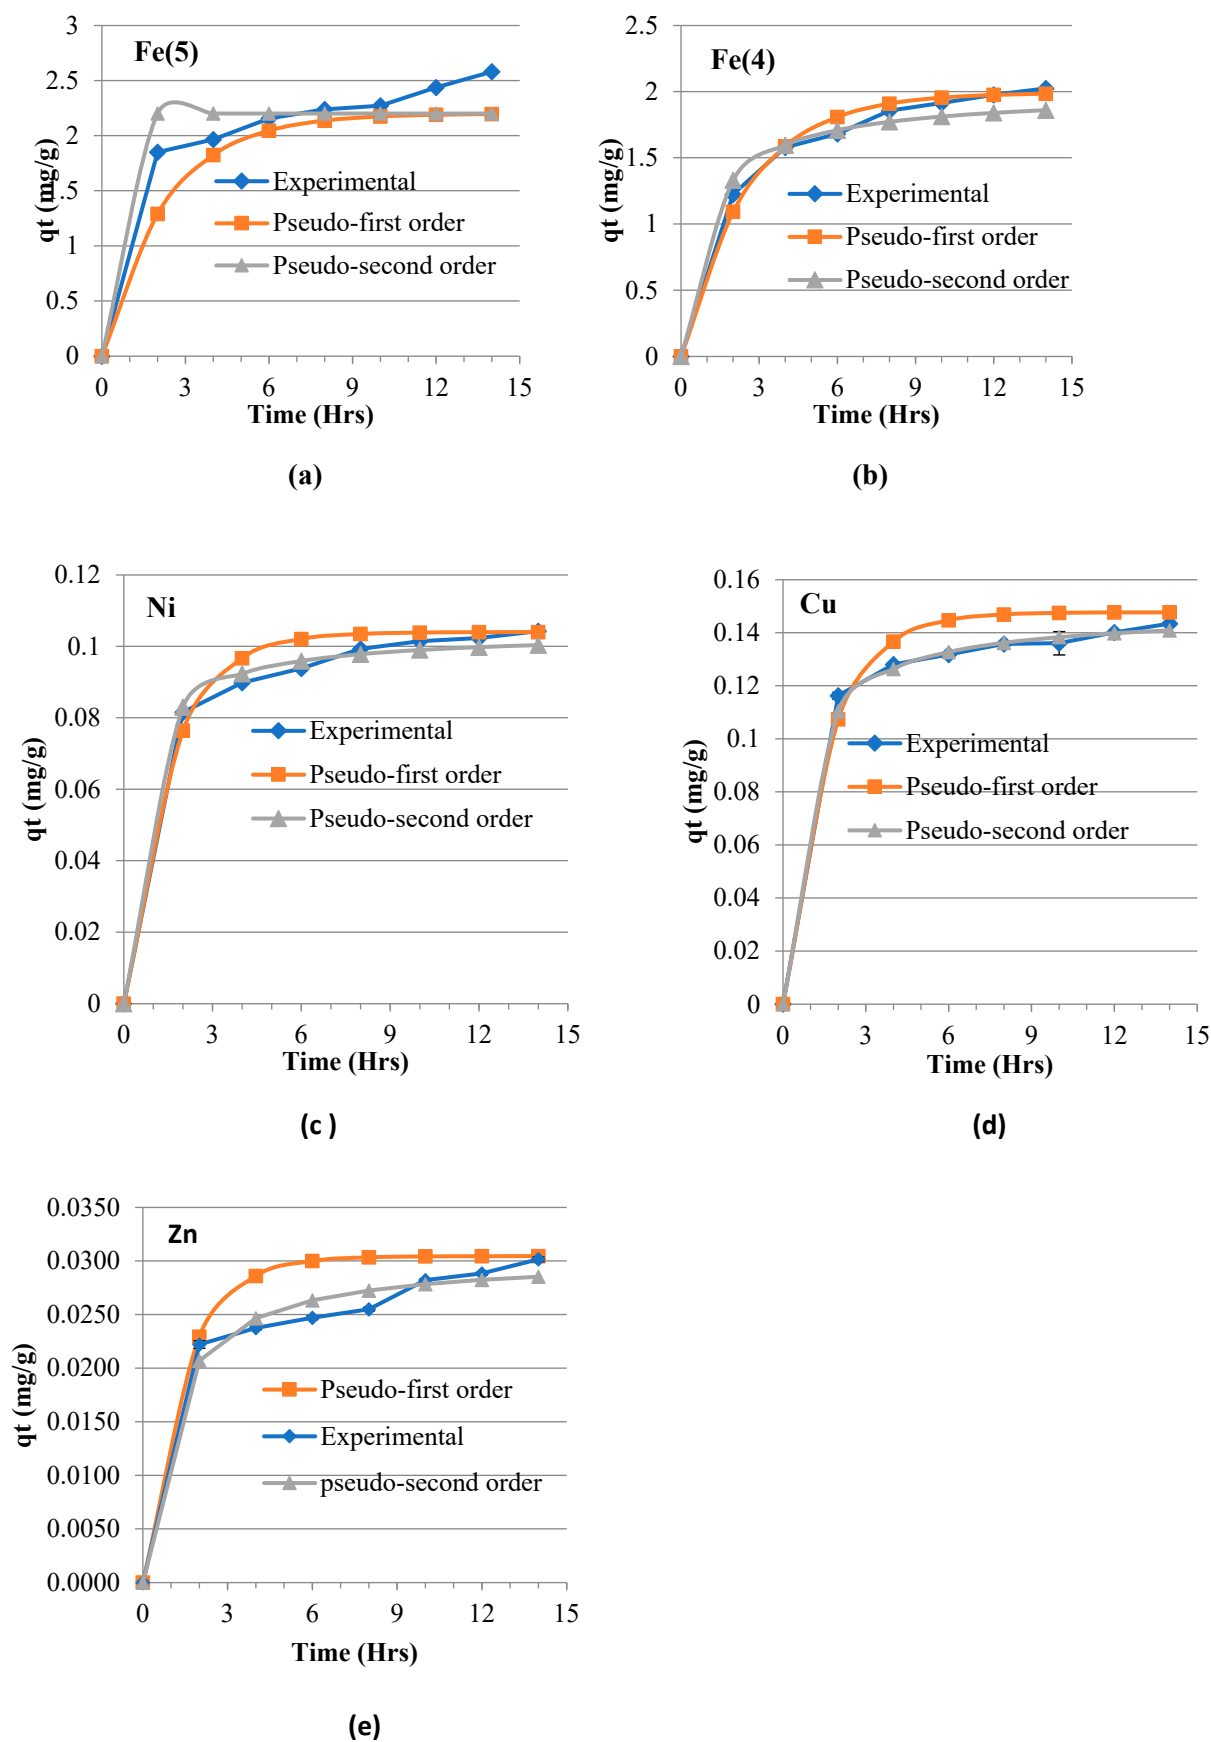

**Figure S2:** Adsorption kinetics for (a) Fe (5) and (b) Fe (4) (c) Ni (d) Cu (e) Zn on tobacco waste

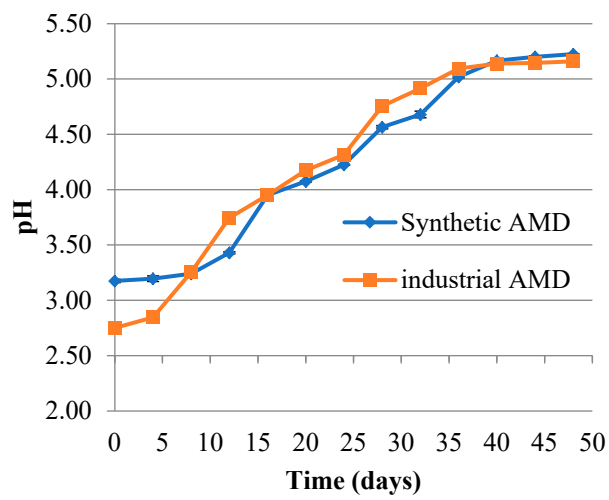

**Figure S3:** Variation of pH during AMD bioremediation
